1 **VC1 catalyzes a key step in the biosynthesis of vicine from GTP in faba bean**

2

3 Emilie Björnsdotter<sup>1,\*</sup>, Marcin Nadzieja<sup>2,\*</sup>, Wei Chang<sup>3,\*</sup>, Leandro Escobar-Herrera<sup>2</sup>, Davide  
4 Mancinotti<sup>1</sup>, Deepti Angra<sup>4</sup>, Hamid Khazaei<sup>5</sup>, Christoph Crocoll<sup>6</sup>, Albert Vandenberg<sup>5</sup>, Frederick L.  
5 Stoddard<sup>7</sup>, Donal M. O’Sullivan<sup>4</sup>, Jens Stougaard<sup>2</sup>, Alan H. Schulman<sup>3,8,+</sup>, Stig U. Andersen<sup>2,+</sup>, and  
6 Fernando Geu-Flores<sup>1,+</sup>

7

8 <sup>1</sup>Section for Plant Biochemistry and Copenhagen Plant Science Centre, Department of Plant and  
9 Environmental Sciences, University of Copenhagen, Frederiksberg, Denmark

10 <sup>2</sup>Department of Molecular Biology and Genetics, Aarhus University, Aarhus, Denmark

11 <sup>3</sup>Institute of Biotechnology and Viikki Plant Science Centre, University of Helsinki, Helsinki, Finland

12 <sup>4</sup>School of Agriculture, Policy and Development, University of Reading, Reading, UK

13 <sup>5</sup>Department of Plant Sciences, University of Saskatchewan, Saskatoon, Canada

14 <sup>6</sup>DynaMo Center, Section for Molecular Plant Biology, Department of Plant and Environmental Sciences,  
15 Faculty of Science, University of Copenhagen, Frederiksberg, Denmark

16 <sup>7</sup>Department of Agricultural Sciences and Viikki Plant Science Centre, University of Helsinki, Helsinki,  
17 Finland

18 <sup>8</sup>Natural Resources Institute Finland (Luke), Helsinki, Finland

19 \* These authors contributed equally to this work.

20 + To whom correspondence should be addressed.

21

22

23

24

## 25 **Abstract**

26 **Faba bean is a widely adapted and high-yielding legume cultivated for its protein-rich seeds<sup>1</sup>.**  
27 **However, the seeds accumulate the anti-nutritional pyrimidine glucosides vicine and convicine, which**  
28 **can cause haemolytic anaemia—favism—in the 400 million individuals genetically predisposed by a**  
29 **deficiency in glucose-6-phosphate dehydrogenase<sup>2</sup>. Here, we identify the first enzyme associated with**  
30 **vicine and convicine biosynthesis, which we name VC1. We show that VC1 co-locates with the major QTL**  
31 **for vicine and convicine content and that the expression of VC1 correlates highly with vicine content**  
32 **across tissues. We also show that low-vicine varieties express a version of VC1 carrying a small, frame-**  
33 **shift insertion, and that overexpression of wild-type VC1 leads to an increase in vicine levels. VC1**  
34 **encodes a functional GTP cyclohydrolase II, an enzyme normally involved in riboflavin biosynthesis from**  
35 **the purine GTP. Through feeding studies, we demonstrate that GTP is a precursor of vicine both in faba**  
36 **bean and in the distantly related plant bitter melon. Our results reveal an unexpected biosynthetic origin**  
37 **for vicine and convicine and pave the way for the development of faba bean cultivars that are free from**  
38 **these anti-nutrients, providing a safe and sustainable source of dietary protein.**

39

## 40 **Main Text**

41 According to the UN's Intergovernmental Panel on Climate Change (IPCC), switching to a plant-based  
42 diet can reduce carbon emissions, especially in the West<sup>3</sup>. The suggested change in diet will require a wider  
43 and more varied cultivation of locally adapted protein crops. On a worldwide basis, faba bean (**Fig. 1a**) has  
44 the highest yield of the legumes after soybean (1.92 Mg/ha in 2013-2017)<sup>4</sup> and the highest seed protein  
45 content of the starch-containing legumes (29% dry-matter basis)<sup>5</sup>. Furthermore, faba bean is adapted to  
46 cool climates such as Mediterranean winters and northern European summers, where soybean performs  
47 poorly<sup>6</sup>. The main factor restricting faba bean cultivation and consumption is the presence of the anti-  
48 nutritional compounds vicine and convicine (**Fig. 1b**). Already in the 5<sup>th</sup> century BC, the Greek philosopher  
49 Pythagoras discouraged his followers from eating faba bean seeds, warning against a potentially fatal  
50 outcome<sup>7</sup>. Indeed, faba bean ingestion may trigger favism—haemolytic anaemia from faba beans—in the  
51 400 million individuals genetically predisposed to it (~4% of the world population). These individuals display

52 a deficiency in glucose-6-phosphate dehydrogenase, which is common in regions with historical endemic  
53 malaria and renders red blood cells susceptible to oxidative challenges. Vicine and convicine themselves are  
54 not strong oxidizing agents, but their metabolic products—divicine and isouramil—can cause irreversible  
55 oxidative damage in red blood cells leading to haemolysis (**Fig. 1b**). In contrast to the well-described  
56 aetiology of favism<sup>2</sup>, the biosynthetic pathway of vicine and convicine in faba bean remains obscure.

57 In order to uncover genes associated with the biosynthesis of vicine and convicine in faba bean, we  
58 carried out a combined gene expression analysis and metabolite profiling of eight aerial tissues of the  
59 inbred line Hedin/2 (**Fig. 1c**). For the gene expression analysis, we assembled the raw RNA-seq data  
60 consisting of both short and long reads into a high-quality transcriptome composed of 49,277 coding  
61 sequences (**Extended Data Table 1**) (**Supplementary File 1**). We then mapped the short reads from each  
62 tissue onto the coding sequences, thus generating an expression matrix (**Supplementary File 2**). For the  
63 metabolite profiling, we analysed methanolic extracts using reverse-phase liquid chromatography coupled  
64 to high-resolution mass spectrometry, which yielded 1,479 unique metabolic features. We arranged these  
65 features into 852 clusters, each composed of one or more metabolic features with matching retention  
66 times and similar abundance patterns across tissues (**Supplementary File 3**). Cluster 103 was composed of  
67 two features whose  $m/z$  values corresponded to protonated vicine (feature 89\_ID; theoretical  $m/z$ :  
68 305.1097; experimental  $m/z$ : 305.1099) and its cognate aglucone (protonated vicine aglucone; feature  
69 108\_ID; theoretical  $m/z$ : 143.0569; experimental  $m/z$ : 143.0567). We confirmed that this cluster  
70 represented vicine by analysing a commercial standard and observing the same two features at a similar  
71 retention time. In both the gene expression and the metabolite datasets, all tissues could be clearly  
72 distinguished from one another using principal coordinate analysis (**Figure 1d**).

73 We then proceeded to analyse gene-to-metabolite correlations. The content of vicine and convicine  
74 in seeds is maternally determined<sup>8</sup>, which suggests that vicine and convicine are synthesized in maternal  
75 tissues and transported from there to developing embryos (**Fig. 1e**). To account for the possibility of  
76 translocation, we excluded isolated embryos from the analysis and computed the Pearson correlation  
77 coefficients across the seven remaining tissues (**Fig. 1f**). We then looked closely at the 20 genes most tightly  
78 correlated with vicine as represented by cluster\_103 (**Supplementary File 4**). Among them, *evg\_1250620*

79 stood out by showing the highest expression level in whole seeds (seed coats plus embryos) at an early  
80 seed-filling stage (Fig. 2a)<sup>9,10</sup> The gene encoded an isoform of 3,4-dihydroxy-2-butanone-4-phosphate  
81 synthase/GTP cyclohydrolase II, a bifunctional enzyme normally involved in riboflavin biosynthesis  
82 (**Extended Data Fig. 1**). A fragment of this gene, mis-annotated as *reticuline oxidase-like*, was previously  
83 identified among five other gene fragments based on gene expression comparison between normal- and  
84 low-vicine and convicine cultivars<sup>11</sup>. More recently, Khazaei et al. (2017)<sup>12</sup> showed that a SNP coding for a  
85 silent mutation within this fragment distinguished between normal- and low-vicine and convicine cultivars  
86 in a diversity panel of 51 faba bean accessions.

87 All known low-vicine and convicine cultivars are derived from a single genetic source. The low vicine  
88 trait is inherited as a single recessive locus, termed *vc*<sup>-</sup>, but the causal gene remains unknown<sup>8</sup>. Previous  
89 work had placed the *vc*<sup>-</sup> locus within a 3.6 cM interval on chromosome 1<sup>13</sup>. We greatly refined the genetic  
90 interval carrying *vc*<sup>-</sup> to 0.21 cM by mapping the low-vicine and convicine phenotype in a population of 1,157  
91 pseudo F2 individuals from a cross between normal- (Hedin/2) and low-vicine and convicine (Disco/1)  
92 inbred lines (**Fig. 2b-c**). Within an overall context of conserved micro-colinearity, *vc*<sup>-</sup> was bounded by  
93 markers defining an approximately 52-kb interval containing only eight genes in the genome of *Medicago*  
94 *truncatula* (*Medtr2g009220* to *Medtr2g009340*, corresponding to chr2:1,834,249-1,886,637). One of these  
95 eight *Medicago* genes, *Medtr2g009270*, encodes an isoform of 3,4-dihydroxy-2-butanone-4-phosphate  
96 synthase/GTP cyclohydrolase II (**Fig. 2c**). Moreover, the SNP identified by Khazaei et al.<sup>12</sup> and a second,  
97 independent SNP within *evg\_1250620* co-segregated fully with the low-vicine and convicine phenotype,  
98 indicating that *evg\_1250620* is present within the refined 0.21-cM *vc*<sup>-</sup> interval (**Fig. 2b**). Together with the  
99 gene-to-metabolite correlation results presented above, these genetic mapping results make *evg\_1250620*  
100 a prime candidate for the *vc*<sup>-</sup> gene. From here on, we will refer to *evg\_1250620* as *VC1*.

101 In our gene expression profiling, *VC1* displayed high expression levels in whole seeds and low  
102 expression levels in isolated embryos (**Fig. 2a**). Because whole seeds are composed of seed coats and  
103 embryos, we hypothesized that *VC1* was highly expressed in seed coats, which are of maternal origin. In  
104 order to verify this, we conducted an additional gene expression study comparing seed coats to embryos of  
105 Hedin/2 using droplet digital PCR (ddPCR). This revealed that the expression of *VC1* was around 7.4 times

106 higher in seed coats than in embryos (**Fig. 2d**). It is worth noting that, in our combined gene expression and  
107 metabolite profiling, embryos stood out as having the highest vicine content, while showing only a  
108 moderate *VC1* gene expression (**Fig. 2e**). These results are consistent with the hypothesis that vicine and  
109 convicine are mainly synthesized in the seed coat and are transported to the embryo (**Fig. 1e**)<sup>9</sup> and suggest  
110 that *VC1* catalyses a key step in vicine biosynthesis.

111 We then investigated whether *VC1* was able to rescue the low-vicine and convicine phenotype. In the  
112 absence of an efficient transformation method for faba bean<sup>14</sup>, we adopted a hairy root transformation  
113 protocol based on *Agrobacterium rhizogenes*<sup>15</sup>. We found that the ubiquitin promoter from *Lotus*  
114 *japonicus* (*pLjUbi*)<sup>16</sup> could successfully drive the expression of *YFP* in hairy roots (**Fig. 2f**), and that hairy  
115 roots of the normal-vicine line Hedin/2 accumulated several-fold more vicine and convicine than hairy roots  
116 of the low-vicine and convicine line Mélodie/2 (**Fig. 2g**). Transformation of Mélodie/2 hairy roots with the  
117 *VC1* coding sequence from Hedin/2 (also under the control of *pLjUbi*) led to a 7-fold increase in vicine levels  
118 compared to the *YFP* control, reaching the same levels as in the Hedin/2 *YFP* control. At the same time, a 3-  
119 fold increase in convicine levels was observed, reaching half the values of the Hedin/2 *YFP* control (**Fig. 2g**).  
120 Hairy roots of Hedin/2 transformed with *VC1* did not accumulate more vicine than the Hedin/2 *YFP* control,  
121 but the levels of convicine increased by a factor of 1.5 (**Fig. 2g**). The fact that *VC1* is able to complement the  
122 low-vicine and convicine phenotype of Mélodie/2 in hairy roots supports the hypothesis that *VC1* is the  
123 causal gene associated with the *vc*<sup>-</sup> locus.

124 Next, we looked into the causal mutation leading to the low-vicine and convicine phenotype. First,  
125 we examined *VC1* expression in the seed coat, where *VC1* from Hedin/2 had shown high expression. Based  
126 on ddPCR, the expression level of *VC1* in Mélodie/2 was 4.7-times lower than in Hedin/2. This difference is  
127 not commensurate with the much lower vicine and convicine levels in Mélodie/2 (typically 10- to 40-times  
128 lower compared to Hedin/2 seeds). We then examined the *VC1* coding sequences cloned from seed coat  
129 cDNA. The coding sequence from Hedin/2 matched the sequence derived from our RNA-seq data exactly. In  
130 contrast, the sequence from Mélodie/2, which we designate *vc1*, contained a 2-nucleotide AT insertion  
131 causing a reading frame shift in the region encoding the GTP cyclohydrolase II (**Fig. 2h, Extended Data Fig.**  
132 **2, Supplementary File 6**). Using seed coat cDNA and PCR primers able to distinguish between *VC1* and *vc1*,

133 we detected only *VC1* in Hedin/2 whereas *vc1* was predominant in Mélodie/2 (**Fig. 2i**). The AT insertion is  
134 located within the first half of the region encoding the GTP cyclohydrolase II and prevents the correct  
135 synthesis of at least half of the enzyme, including key residues that are necessary for activity<sup>17</sup> (**Fig. 2h**,  
136 **Extended Data Fig. 2**). This suggests that this AT insertion is the direct cause of the low vicine and convicine  
137 levels of Mélodie/2 (and all other known low-vicine and convicine cultivars) and that the GTP  
138 cyclohydrolase II domain of *VC1* is involved in the biosynthesis of vicine and convicine.

139 Vicine and convicine are pyrimidine glucosides and were thought to be derived from the orotic acid  
140 pathway of pyrimidine biosynthesis (**Fig. 3a**)<sup>18</sup>. This is not consistent with our identification of *VC1*, which is  
141 presumably involved in purine-based riboflavin biosynthesis. Of the two putative enzymes encoded by the  
142 bifunctional *VC1*, GTP cyclohydrolase II catalyzes the first step of the riboflavin pathway, which is the  
143 conversion of the purine nucleoside triphosphate GTP into the unstable intermediate 2,5-diamino-6-  
144 ribosylamino-4(3*H*)-pyrimidinone 5'-phosphate (DARPP). Next, a deaminase converts DARPP into a second  
145 unstable intermediate, 5-amino-6-ribosylamino-2,3(1*H*,3*H*)-pyrimidinedione 5'-phosphate (ARPDP). We  
146 noticed a structural similarity between DARPP/ARPDP and vicine/convicine, respectively. Accordingly, we  
147 hypothesize that vicine and convicine are derived respectively from DARPP and ARPDP via a parallel, 3-step  
148 biochemical transformation (**Fig. 3a**). The first of these proposed transformations is a hydrolysis that has  
149 recently been shown to be catalyzed by COG3236 in bacteria and plants<sup>19</sup>. Only two more steps would be  
150 necessary to produce vicine and convicine: a deamination and a glucosylation (**Fig. 3a**).

151 To test our pathway hypothesis, we first tested the activity of the *VC1* protein *in vitro*. For this, we  
152 expressed a tagged version of *VC1* in *E. coli* and purified it using affinity chromatography (**Extended Data**  
153 **Fig. 4a**). The purified enzyme was able to convert GTP to DARPP (**Extended data Fig. 4b**). Kinetic studies  
154 revealed a  $K_M$  value of  $66 \pm 12 \mu\text{M}$  and a turnover number of  $1.6 \pm 0.11 \text{ min}^{-1}$  (**Fig. 3b**). These kinetic  
155 parameters resemble those of other functional GTP cyclohydrolase II enzymes<sup>20,21,22</sup>. Then, we fed  
156 <sup>13</sup>C<sub>10</sub>, <sup>15</sup>N<sub>5</sub>-GTP to Hedin/2 roots to determine whether GTP was a precursor for vicine and convicine. This  
157 resulted in the detection of both <sup>13</sup>C<sub>4</sub>, <sup>15</sup>N<sub>4</sub>-vicine and <sup>13</sup>C<sub>4</sub>, <sup>15</sup>N<sub>3</sub>-convicine, whereas the feeding of unlabelled  
158 GTP did not (**Fig. 3c-d**). We performed analogous feeding studies with narrow-leafed lupin (*Lupinus*  
159 *angustifolius*), a legume that does not accumulate vicine and convicine, and these did not result in the

160 detection of labelled vicine and convicine (**Fig. 3c-d**). Finally, we fed  $^{13}\text{C}_{10}$ ,  $^{15}\text{N}_5$ -GTP to roots of bitter melon  
161 (*Momordica charantia*), which is a phylogenetically remote species (*Cucurbitaceae*) that accumulates vicine  
162 but not convicine. This resulted in the detection of the same labelled vicine species seen previously in faba  
163 bean ( $^{13}\text{C}_4$ ,  $^{15}\text{N}_4$ -vicine) (**Fig. 3c-d**). These feeding experiments establish GTP as a precursor for vicine and  
164 convicine and indicate that vicine biosynthesis from GTP evolved independently at least twice.

165 In summary, we have identified *VC1* as a key gene in the biosynthesis of vicine and convicine as well  
166 as the mutated *vc1* gene that represents the single known genetic source of low vicine and convicine  
167 content. Our study also demonstrates that the pyrimidine glucosides vicine and convicine are not derived  
168 from pyrimidine metabolism but from purine metabolism, specifically from intermediates in the riboflavin  
169 pathway. This work represents a stepping stone towards the complete elucidation of the biosynthetic  
170 pathway of vicine and convicine as well as the full elimination of these anti-nutritional compounds from  
171 faba bean.

172

173

174

175

176

177

178

179

180

181

182

183

184

185

186

## 187 Main References

- 188 1. Duc, G. *et al.* Faba Bean. *Grain Legumes* 141–178 (2015) doi:10.1007/978-1-4939-2797-5\_5.
- 189 2. Luzzatto, L. & Arese, P. Favism and glucose-6-phosphate dehydrogenase deficiency. *N Engl. J. Med.* vol.  
190 378 1068–1069 (2018).
- 191 3. Shukla, P.R. *et al.* The Intergovernmental Panel on Climate Change (IPCC). Summary for Policymakers.  
192 In: Climate Change and Land: an IPCC special report on climate change, desertification, land degradation,  
193 sustainable land management, food security, and greenhouse gas fluxes in terrestrial ecosystems. In press  
194 (2019).
- 195 4. FAOSTAT. Food and Agriculture Organization of the United Nations.  
196 <http://www.fao.org/faostat/en/#home>. Visited 27.02.2020.
- 197 5. Feedipedia - Animal Feed Resources Information System - INRA, CIRAD, AFZ and FAO.  
198 <https://www.feedipedia.org>. Visited 27.02.2020.
- 199 6. Stoddard, F.L. Grain legumes: an overview. Chapter 5, pp. 70-87 in: Legumes in Cropping Systems, eds.  
200 Murphy-Bokern, D., Stoddard, F.L., & Watson, C.A. CAB International, Oxford, UK (2017).
- 201 7. Meletis, J. & Konstantopoulos, K. Favism-from the ‘avoid fava beans’ of Pythagoras to the present.  
202 *Haema* **7**, 17–21 (2004).
- 203 8. Duc, G., Sixdenier, G., Lila, M. & Furstoss, V. Search of genetic variability for vicine and convicine  
204 content in *Vicia faba* L.: a first report of a gene which codes for nearly zero-vicine and zero-convicine  
205 contents. in *1. International Workshop on Antinutritional Factors (ANF) in Legume Seeds, Wageningen*  
206 *(Netherlands), 23-25 Nov 1988* (Pudoc, 1989).
- 207 9. Ramsay, G. & Griffiths, D. W. Accumulation of vicine and convicine in *Vicia faba* and *V. narbonensis*.  
208 *Phytochemistry* **42**, 63–67 (1996).
- 209 10. Lin, J.Y. *et al.* Similarity between soybean and *Arabidopsis* seed methylomes and loss of non-CG  
210 methylation does not affect seed development. *Proc. Natl. Acad. Sci. U. S. A.* **114**, E9730–E9739 (2017).
- 211 11. Ray, H., Bock, C. & Georges, F. Faba Bean: Transcriptome analysis from etiolated seedling and  
212 developing seed coat of key cultivars for synthesis of proanthocyanidins, phytate, raffinose family  
213 oligosaccharides, vicine, and convicine. *Plant Genome* **8**, (2015).
- 214 12. Khazaei, H. *et al.* Development and validation of a robust, breeder-friendly molecular marker for the  
215 *vc*- locus in faba bean. *Mol. Breed.* **37**, 140 (2017).
- 216 13. Khazaei, H. *et al.* Flanking SNP markers for vicine–convicine concentration in faba bean (*Vicia faba* L.).  
217 *Mol. Breed.* **35**, 38 (2015).
- 218 14. O’Sullivan, D. M. & Angra, D. Advances in faba bean genetics and genomics. *Front. Genet.* **7**, 150  
219 (2016).
- 220 15. Kereszt, A. *et al.* *Agrobacterium rhizogenes*-mediated transformation of soybean to study root biology.  
221 *Nat. Protoc.* **2**, 948–952 (2007).



- 222 16. Reid, D. *et al.* Cytokinin biosynthesis promotes cortical cell responses during nodule development.  
223 *Plant Physiol.* **175**, 361–375 (2017).
- 224 17. Hiltunen, H.-M., Illarionov, B., Hedtke, B., Fischer, M. & Grimm, B. *Arabidopsis* RIBA proteins: two out  
225 of three isoforms have lost their bifunctional activity in riboflavin biosynthesis. *Int. J. Mol. Sci.* **13**, 14086–  
226 14105 (2012).
- 227 18. Brown, E. G. & Roberts, F. M. Formation of vicine and convicine by *Vicia faba*. *Phytochemistry* **11**,  
228 3203–3206 (1972).
- 229 19. Frelin, O. *et al.* A directed-overflow and damage-control N-glycosidase in riboflavin biosynthesis.  
230 *Biochem. J* **466**, 137–145 (2015).
- 231 20. Lehmann, M. *et al.* Biosynthesis of riboflavin. Screening for an improved GTP cyclohydrolase II mutant.  
232 *FEBS J.* **276**, 4119–4129 (2009).
- 233 21. Spoonamore, J. E. & Bandarian, V. Understanding functional divergence in proteins by studying  
234 intragenomic homologues. *Biochemistry* **47**, 2592–2600 (2008).
- 235 22. Yadav, S. & Karthikeyan, S. Structural and biochemical characterization of GTP cyclohydrolase II from  
236 *Helicobacter pylori* reveals its redox dependent catalytic activity. *J. Struct. Biol.* **192**, 100–115 (2015).

237

238

239

240

241

242

243

244

245

246

247

248

249

250

251

252

## 253 **Methods**

### 254 *Gene expression analysis, metabolite profiling, and gene-to-metabolite correlations*

255 *Plant growth and sampling.* Faba bean plants of the inbred line Hedin/2 were grown in the field at Sejet  
256 International ApS (Horsens, Denmark). The following tissue types were collected: i) young leaf (closest to  
257 the shoot meristem, not fully open); ii) mature leaf (fully open); iii) flower (banner petals open); iv) pod at  
258 early seed-filling (EF) stage; v) whole seed at EM stage (containing seed coat and embryo); vi) embryo at  
259 mid maturation (MM) stage; vii) pod at MM stage; viii) stem (4 - 5 cm segments positioned 5 cm below the  
260 top of the shoot meristem). Sample collection was carried out at the same time of the day to reduce the  
261 influence of circadian rhythm. Tissue samples were harvested, flash frozen on site, and later ground and  
262 split into pools for RNA isolation and metabolite extraction. For EF seeds, due to prolonged dissection time  
263 resulting in small volume of samples difficult to split, six separate replicates were harvested, of which three  
264 were used for transcriptome analysis and another three for metabolite profiling. The ground tissue pools  
265 were stored at -80 °C until further analysis.

266 *Gene expression analysis.* Total RNA was extracted from ground tissues using the NucleoSpin RNA Plant  
267 extraction kit (Macherey-Nagel). Non-strand-specific cDNA libraries of 250-300 bp were synthesized and  
268 sequenced by Novogene (Hong Kong) using the HiSeq PE150 sequencer (Illumina), resulting in 30-43 million  
269 reads per sample. Additionally, two strand-specific Illumina libraries (Novogene, Hong Kong) and one  
270 PacBio library (Earlham Institute, UK) prepared from a pool of the RNA samples were sequenced, yielding  
271 64 and 0.5 million reads, respectively. A *de novo* assembly of the *V. faba* Hedin/2 gene set was created  
272 using Trinity 2.4.0<sup>1</sup>. First, an assembly was made independently for each tissue. Triplicates were used  
273 alongside long reads from the PacBio dataset. For the pool of RNA samples, only two duplicates were  
274 employed. To reduce the redundancy within each assembly, the assemblies were subjected to CD-HIT-EST  
275 clustering with a sequence identity threshold of 0.95 and a word size of eight<sup>2</sup>. The clustered assemblies  
276 were then merged into one to create a combined gene set. Next, the EvidentialGene pipeline was run using

277 standard settings to filter for quality and further decrease for redundancy<sup>3</sup>. The quality of the assemblies  
278 were accessed by mapping reads back to the assemblies using BWA-mem and BUSCO<sup>4,5</sup>. Transcript  
279 quantification was performed by using Bowtie2, R and RSEM<sup>6,7</sup>. Bowtie2 was run in the following modes:  
280 no discordant, no gaps in the first 1000 bases, no-mixed, and end-to-end mode. Finally, the set of  
281 transcripts was filtered with an expression cut-off set to 1 transcript per million mapped reads (TPM) across  
282 the tissues.

283 Metabolite profiling. Ground tissues were freeze-dried and around 2.5 mg of dry material was extracted  
284 with 200  $\mu$ l of 60% MeOH containing 50  $\mu$ M caffeine as internal standard. The mixture was shaken for  
285 15 min at 1 200 rpm and centrifuged at 13 500  $\times g$  for 5 min. The supernatant was diluted 10x with 15%  
286 MeOH and cleared through 0.22  $\mu$ m filters. Reversed-phase LC-MS analysis was performed on a Thermo  
287 Fisher Dionex UltiMate 3000 RS HPLC/UHPLC system fitted with a Kinetex EVO C18 column (100  $\times$  2.1 mm,  
288 1.7  $\mu$ m, 100  $\text{\AA}$ , Phenomenex) and interfaced to an ESI compact QqTOF mass spectrometer (Bruker). The  
289 eluent flow rate was 0.3 ml/min and the column temperature was kept constant at 40  $^{\circ}$ C. Mobile phases  
290 A and B consisted of 0.05% formic acid in water and 0.05% formic acid in acetonitrile, respectively. The  
291 elution profile was 0 – 5 min, 0% B constant; 5 – 24 min, 0 – 100% B linear; 24 – 26 min, 100% B linear,  
292 26 – 27 min, 100% – 0% B linear; 27 – 35 min, 100% B constant. ESI mass spectra were acquired in positive  
293 ionization mode with the following parameters: capillary voltage of 4500 V; end plate offset of -500 V;  
294 source temperature of 250  $^{\circ}$ C; desolvation gas flow of 8.0 l/min; nebulizer pressure of 2.5 bar. Nitrogen was  
295 used as desolvation and nebulizer gas. The scanned  $m/z$  range was 50 to 1000. Sodium formate clusters  
296 were used for internal mass calibration and were introduced at the beginning of each run (first 0.5 min).  
297 Each tissue extract was injected twice (technical replicates) and a blank sample was run every 10 injections.  
298 The raw LC-MS chromatograms were mass calibrated, converted to mzXML format and submitted to XCMS  
299 Online (ver. 3.7.1) for alignment, feature detection and quantification<sup>8</sup>. A multijob analysis was performed  
300 using the default settings for UPLC/Bruker Q-TOF instruments and considering the following sample groups:

301 EF pods (n = 8), MM pods (n = 4), EF seeds (n = 6), MM embryos (n = 6), flowers (n = 4), stems (n = 4), young  
302 leaves (n = 4), mature leaves (n = 3), and blanks (n = 8). Biological and technical replicates were treated as  
303 independent samples. Metabolite features were defined as mass spectral peaks of width between 5 and 20  
304 seconds and signal-to-noise ratio of at least 6:1. Metabolic features derived from the mass calibrant  
305 (retention time < 0.5 min) were removed. The dataset was further filtered by removing metabolic features  
306 whose intensity in any of the tissue sample groups was not significantly different from that in the blank  
307 sample group ( $p < 0.01$  in Student's T-test). After filtering, the intensities of the remaining metabolite  
308 features were normalized to the dry weight of the samples and to the signal of the internal standard  
309 (the protonated molecular ion of caffeine). The normalized intensity profile of each metabolite feature was  
310 centred and scaled. Using MultiExperiment Viewer (ver. 4.9)<sup>9</sup>, the metabolite features were subjected to  
311 complete-linkage hierarchical clustering analysis (HCA) based on the Pearson's correlation coefficient  
312 between their centred and scaled intensity profiles. The HCA dendrogram was manually divided into  
313 discrete metabolic clusters of the largest possible height and composed entirely of metabolite features with  
314 overlapping median retention times (difference of < 6 s). As indicated in the main text, we identified  
315 a cluster (cluster 108) composed of two features, corresponding to protonated vicine (median  $m/z$   
316 305.1099) and protonated vicine aglucone (median  $m/z$  143.0567). The separate running of a commercial  
317 vicine standard confirmed that these two features represented vicine. Two analogous metabolic features  
318 were found for convicine (median  $m/z$  306.0994 and 144.0491). However, due to vicine and convicine  
319 having the same retention time in our experimental setup, these features represented not only the  
320 convicine-related [M+1] ions, but also the respective vicine-related [M+2] ions. Accordingly, these  
321 additional features were not investigated further.

322 *Gene-to-metabolite correlations.* Prior to calculating correlation coefficients, expression and metabolite  
323 data was normalized using Poisson-seq<sup>10</sup>. We then used the 'cor' function of R (version 3.4.3)<sup>11</sup> to calculate  
324 the Pearson correlation coefficients for gene expression (quantified as TPM) versus the normalized

325 intensity of metabolic features. The correlations obtained were then averaged across the metabolic  
326 features in each metabolic cluster. For all tissues except EF seeds, individual samples were directly matched  
327 in the correlation analysis. For EF seeds, separate samples were used for gene expression and metabolite  
328 profiling, and the mean of the replicates was used for the correlation analysis. Since vicine and convicine  
329 are likely to be produced in maternal tissues and transported to the embryo (see main text), MM embryos  
330 were excluded from the analysis. A total of 17 samples from the following tissues were used in this analysis:  
331 flowers (3), stems (3), young leaves (3), mature leaves (2), EF pods (3), EF seeds (1), and MM pods (2). See  
332 **Supplementary File 5** for full details and the R scripts used.

### 333 *ddPCR-based quantification of VC1 expression in embryo vs seed coat*

334 Plants were grown in the greenhouse of the Viikki Plant Science Centre (Helsinki, Finland). Embryo and seed  
335 coat tissues were harvested from Hedin/2 plants at the mid maturation stage and flash frozen. Frozen  
336 tissues were ground using TissueLyser MM300 oscillatory mixer mill (Qiagen Retsch). For embryo tissue,  
337 RNA was extracted from single embryos using 1 ml TRIzol (Thermo Fisher Scientific) following the  
338 manufacturer's instructions. The extracted RNA was treated with DNaseI (Ambion) and purified with an  
339 RNeasy MinElute Cleanup Kit (Qiagen). For seed coats, RNA was extracted from 100 mg of powdered tissue  
340 using the RNeasy Plant Mini Kit (Qiagen) including DNase treatment. Extractions were made as three  
341 technical replicates per plant and as three plants for each tissue. First-strand cDNA was synthesized using  
342 Superscript IV reverse transcriptase (Invitrogen) and primed with oligo(dT). Droplet digital PCR was carried  
343 out on a QX200 AutoDG Droplet Digital PCR System (Bio-Rad). The PCR reaction contained 10  $\mu$ L of 2x  
344 QX200 ddPCR EvaGreen Supermix (Bio-Rad), 100 nM forward primer (CTTCTTGCATTCTCCTCATTTCTC) and  
345 100 nM reverse primer (CCCTCCAGATACCAATGCAGCTTTAACC), 1  $\mu$ l cDNA, and nuclease-free water to a  
346 final volume of 20  $\mu$ L. The PCR program consisted of 95  $^{\circ}$ C for 5 min; 40 cycles of denaturation at 95  $^{\circ}$ C for  
347 30 s followed by annealing/extension at 58  $^{\circ}$ C for 1 min (ramp rate of 2  $^{\circ}$ C s<sup>-1</sup>); and signal stabilization at 4  
348  $^{\circ}$ C for 5 min. The resulting data were analyzed with QuantaSoft software v1.7 (Bio-Rad).

349

350 *Specific amplification of VC1 and vc1 from seed coat of Hedin/2 and Mélodie/2*

351 Seed coat RNA was extracted and converted to cDNA as described in the previous section. For the specific  
352 amplification of *vc1* (with AT insertion), we used forward primer GACATATTTGGATCTGCCACATATG and  
353 reverse primer TCCTCAAAGACCAGTAGCACC. PCR was carried out using 1 µl cDNA using the following  
354 temperature program: 94 °C for 2 min; 40 cycles of denaturation at 94 °C for 30 sec, annealing at 58 °C for  
355 30 sec, and extension at 72 °C for 40 sec; signal stabilization at 72 °C for 5 min. For the specific amplification  
356 of the active *VC1* form (no AT insertion), an alternative forward primer was used:  
357 GACATATTTGGATCTGCCACTTG. A similar amplification program was used, but with an annealing  
358 temperature of 54 °C.

359 *Targeted analysis of vicine and convicine*

360 Approximately 2.5 mg of dry tissue was weighed, ground and extracted with 200 µl of 60% MeOH  
361 containing 8 µM uridine as internal standard. The mixture was shaken for 15 min at 1 200 rpm at room  
362 temperature, followed by a 5-min centrifugation at 12 000 rpm. The supernatant was diluted 10x with 90%  
363 acetonitrile and cleared using a 0.22-µm filter. HILIC chromatography coupled to mass spectrometry was  
364 used to detect vicine and convicine through a method developed by Purves *et al.* (Purves, 2018).  
365 Chromatography was performed on an Advance UHPLC system (Bruker, Bremen, Germany) with an Acquity  
366 UPLC BEH Amide column (2.1 x 50 mm, 1.7 µm, Waters). The mobile phases consisted of solvent A (10 mM  
367 ammonium acetate and 0.1% formic acid in water) and solvent B (10 mM ammonium acetate and 0.1%  
368 formic acid in 90:10 acetonitrile:water). The following gradient program was run at a flow rate of 400  
369 µl/min: from 100% - 90% B for 0.5 min; from 90% to 75% B for 3.5 min; from 75% to 100% B for 0.2 min;  
370 100% B for 3.8 min. The HILIC column was coupled to an EVOQ Elite triple quadrupole mass spectrometer  
371 (Bruker, Bremen, Germany) equipped with an electrospray ionisation source (ESI). The ion spray voltage  
372 was maintained at -5000 V. Cone temperature was set to 350 °C and cone gas pressure to 20 psi. The

373 temperature of the heated probe was set to 275 °C and the probe gas pressure to 30 psi. Nebulizing gas  
374 was set to 40 psi and collision gas to 1.6 mTorr. Nitrogen was used as cone gas, probe gas and nebulizing  
375 gas and argon as collision gas. Multiple reaction monitoring (MRM) was carried out in negative mode and  
376 the transitions used were 303 → 141 for vicine (collision energy (CE) = 15 eV), 304 → 141 for convicine (CE  
377 = 19 eV), and 243 → 200 for uridine (CE = 6 eV). Uridine signals were used for normalization, and external  
378 standard curves (1-2000 nM) were used for quantification of vicine and convicine. Bruker MS Workstation  
379 software (Version 8.2.1, Bruker, Bremen, Germany) was used for data acquisition and processing.

### 380 *Fine mapping of $vc^-$*

381 Inbred lines Hedin/2 and Disco/1 (normal- and low- vicine phenotype, respectively) were crossed to obtain  
382 an F<sub>2</sub> population of 73 F<sub>2</sub> individuals. Selfed seeds from 39 F<sub>3</sub> individuals, which were heterozygous across  
383 the previously defined  $vc^-$  interval<sup>12</sup>, were grown to form a pseudo-F<sub>2</sub> population of 1,157 individual plants  
384 segregating for the  $vc^-$  gene. Individual SNP (Single Nucleotide Polymorphism) KASP assays were selected  
385 from previous maps based on the 3.4-cM interval reported by Khazaei<sup>12</sup> or designed based on markers  
386 mined from RNA-seq data. The markers used are described in **Extended Data Table 2**. KASP markers  
387 developed by Webb et al.<sup>13</sup> bounding the  $vc^-$  interval described by Khazaei et al.<sup>12</sup> were initially used to  
388 screen the Hedin/2 x Disco/1 pseudo-F<sub>2</sub> population for putative recombinants. 90 recombinants were  
389 found, which were then genotyped for the full panel of  $vc^-$ -targeted polymorphisms together with the  
390 parental stocks. A genetic map fragment was constructed using R/QTL<sup>14</sup>. Dry seeds of 48 informative  
391 recombinants were harvested, ground to flour, and analysed for vicine and convicine using the targeted  
392 analysis described above.

### 393 *Cloning of VC1 and vc1 coding sequences*

394 The VC1 coding sequence was cloned from Hedin/2 roots as well as from seed coats. When using roots as  
395 starting material, we used 2-week-old seedlings grown on vermiculite at room temperature. We used the  
396 Spectrum Plant Total RNA Kit (Sigma-Aldrich) to extract RNA. cDNA was synthesized from RNA using the

397 SuperScript™ III First-Strand Synthesis System (Thermo Fisher Scientific) and oligo (dT)<sub>20</sub> primers. The coding  
398 sequence was amplified by PCR using cDNA as template and the following primers:

399 ATGGCAGCTGCTACTTTCAAT and TCAAACAGTGATTTTAACACCATTGTTA. The PCR product was cloned into  
400 vector pJET1.2/blunt using CloneJet PCR Cloning Kit (Thermo Scientific) and sequenced. When using seed  
401 coats as starting material, RNA was extracted as described above for ddPCR and cloned as described below  
402 for *vc1*.

403 The *vc1* coding sequence was cloned from Melodie/2 seed coats harvested from greenhouse-grown plants.  
404 The seed coats were isolated 20-25 days after tripping (hand pollination). RNA was extracted from frozen  
405 seed coat powder as described above for ddPCR. First-strand cDNA was carried out also as described above  
406 for ddPCR. The coding sequence of *vc1* was amplified by PCR using cDNA as template as well as primers  
407 CTTCTTGATTCTCTCATTTCCTC (forward) and TCCTCAAAGACCAGTAGCACC (reverse), which target the 5'  
408 and 3' ends of the transcript, respectively. The PCR product was cloned into pGEM®-T (Promega) and  
409 sequenced.

#### 410 *Overexpression of VC1 in hairy roots*

411 In order to introduce 3 silent mutations that removed *Bpil* and *Bsal* restriction sites, we synthesized the  
412 coding sequence of *VC1* cloned from root cDNA (GeneScript). The synthesized sequence was PCR amplified  
413 using primers ATGAAGACGGAATGATGGCAGCTGCTACTTTCAAT and

414 ATGAAGACGGAAGCTCAAACAGTGATTTTAACACC, which added GoldenGate overhangs for creating an SC  
415 module<sup>15</sup>. The level-0 plasmid SC-*VC1* was created in a 20 µl reaction containing 100 ng of the gel-purified  
416 PCR product, 100 ng of the target pICH vector, 5 U of T4 ligase (Thermo Scientific), 2.5 U of *Bpil* (Thermo  
417 Scientific), and 2 µl of 10x T4 ligase buffer. The following temperature programme was used: 25x (37 °C for  
418 3 min, 16 °C for 4 min), 65 °C for 5 min, and 80 °C for 5 min. The overexpression construct *LjUbi:VC1*

419 (**Supplementary File 7**) was created in a 20 µl reaction containing 100 ng of each of the following plasmids:



420 PU-LjUbi, SC-VC1, T-35s, and pIV10, as well as 5U of T4 ligase, 2.5 U of Bsal (New England BioLabs), and 2  $\mu$ l  
421 10x T4 ligase buffer.

422 Seeds of Mélodie/2 and Hedin/2 were surface-sterilized for 10 min on 0.5% sodium hypochlorite and  
423 subsequently rinsed 5 times with sterile water. The sterilized seeds were germinated on petri dishes lined  
424 with moist filter paper and transferred to magenta boxes containing moist vermiculite. Plants were grown  
425 at 21 °C with a photoperiod of 16/8 h. In parallel, plasmids *LjUbi:YFP*<sup>16</sup> and *LjUbi:VC1* were conjugated into  
426 *Agrobacterium rhizogenes* GV3101 using triparental mating<sup>17</sup>. We then infected the *in-vitro*-grown plants  
427 with the transformed *A. rhizogenes* using a protocol adapted from Kereszt et al.<sup>18</sup>. Briefly, seedlings that  
428 had produced two true leaves were wounded at the hypocotyls and inoculated with a high-density  
429 suspension of *A. rhizogenes*. Inoculated plants were incubated in the dark for 48 h and then grown at 21 °C  
430 with a photoperiod of 16/8 h for 3-4 weeks. Hairy root tissue was flash frozen in liquid nitrogen and freeze-  
431 dried for targeted vicine and convicine analysis.

#### 432 *Stably labelled precursor feeding experiments*

433 Seeds of faba bean (Hedin/2), narrow-leafed lupin (cv. Oskar, purchased from HR Smolice, Poland) and  
434 bitter melon (purchased from Bjarne's Frø og Planter, Denmark) were germinated on moist paper. 3-4-day  
435 seedlings were transferred to 2-ml Eppendorf tubes, where they were fed for 72 h with 1.5 ml of 1 mM  
436 <sup>13</sup>C<sub>10</sub>, <sup>15</sup>N<sub>5</sub>-GTP in 5 mM Tris buffer at pH 7.2 through the roots. As controls, seedlings were fed with  
437 unlabelled GTP instead. The entire roots were cut from the seedlings, frozen in liquid nitrogen, and freeze-  
438 dried. The targeted analysis of labelled vicine and convicine was carried out as described above for  
439 unlabelled vicine and convicine, except for the MRM transitions used, which were 311 → 149 (CE = 15 eV)  
440 for labelled vicine (<sup>13</sup>C<sub>4</sub>, <sup>15</sup>N<sub>4</sub>-vicine) and 311 → 148 (CE = 19 eV) for labelled convicine (<sup>13</sup>C<sub>4</sub>, <sup>15</sup>N<sub>3</sub>-convicine).  
441 For quantification, labelled vicine and convicine were assumed to have the same ionization efficiencies as  
442 their unlabelled forms.

443 *Expression and purification of His-tagged VC1*

444 We predicted the chloroplast transit peptide (cTP) of VC1 using TargetP online (version 2.0)<sup>19</sup>. An *E. coli*  
445 codon-optimized version of VC1 coding for an N-terminal His-tag and lacking the predicted cTP-coding  
446 region (**Supplementary File 7**) was synthesized (GenScript) and cloned into expression vector pET22b(+)  
447 using restriction sites NdeI and HindIII. The plasmid was transformed into ArcticExpress (DE3) RIL *E. coli*  
448 competent cells (Agilent Technologies) and protein expression was performed mainly as described by  
449 Hiltunen *et al.*<sup>20</sup>. Cells were grown at 37 °C and 220 rpm in 750 ml of selective LB media up to an OD<sub>600</sub> of  
450 0.5-0.7. The culture was cooled on ice and subsequently induced by adding IPTG to a final concentration of  
451 1 mM. Protein expression took place for 24 h at 13°C and 170 rpm. After pelleting, cells were resuspended  
452 in 2 ml of lysis buffer (50 mM Tris, 300 mM NaCl, 0.01% β-mercaptoethanol, 2 mM imidazole, pH 7.5), and  
453 400 μl of 25x cComplete EDTA-free protease inhibitor was added before adding 0.2 mg of lysozyme.  
454 Following a 1 h incubation on ice and subsequent sonication, the lysate was cleared by centrifugation at  
455 17 000 x *g* and 4 °C for 25 min. The His-tagged protein was immediately purified from the cleared lysate  
456 using affinity chromatography with stepwise elution. The lysate was gently shaken with 0.5 ml of Ni-NTA  
457 agarose suspension (Qiagen) for 1 h at 4 °C and transferred to a filter column where the liquid was drained.  
458 The matrix was washed 3 times with 1.5 ml washing buffer (50 mM Tris, 300 mM NaCl, 0.01% β-  
459 mercaptoethanol, 5 mM imidazole, pH 7.5). Elution was carried out using 1 ml of four different elution  
460 buffers with different imidazole concentrations (50 mM Tris, 300 mM NaCl, and either 20 mM, 50 mM,  
461 100 mM, or 250 mM imidazole, pH 7.5). The different eluate fractions were analysed by SDS-PAGE, which  
462 revealed that most of the heterologously expressed protein eluted in the fraction with 250 mM imidazole  
463 (**Extended Data Fig. 4**). To remove imidazole and concentrate the protein, the 250 mM imidazole fraction  
464 was buffer-exchanged into storage buffer (20 mM Tris, 200 mM NaCl, 5% (v/v) glycerol, pH 8.0) using a 30K  
465 Amicon filter. The purified enzyme was assayed immediately or stored at -20 °C, which preserved enzyme

466 activity. A typical yield of purified VC1 from a 750 ml culture was 6 mg. Protein concentration was  
467 estimated using the Pierce™ BCA Protein Assay Kit (ThermoFisher).

#### 468 *Enzyme assays and kinetics*

469 Enzyme activity was analysed as previously reported<sup>21, 22</sup>. The reaction was carried out in 200 µl and  
470 contained 50 mM Tris at pH 8.0, 100 mM NaCl, 10 mM MgCl<sub>2</sub> and GTP at concentrations varying from 0-  
471 244 µM. The reaction was started by adding 5 µg of purified VC1. Conversion of GTP to the product 2,5-  
472 diamino-6-β-ribose-4(3H)-pyrimidinone-5'-phosphate (DARPP) was monitored by measuring absorbance at  
473 310 nm for 5 min using a microplate reader (Spectramax M5, Molecular Devices). The reaction rate was  
474 calculated using the extinction coefficient for DARPP (7.43 cm<sup>-1</sup> mM<sup>-1</sup>) as previously reported<sup>21, 22</sup>. The  
475 kinetic parameters  $K_M$  and  $V_{max}$  were calculated by non-linear regression to fit the data to the Michaelis-  
476 Menten equation using Sigmaplot v13.0.

477

## 478 **Method References**

- 479 1. Grabherr, M. G. *et al.* Full-length transcriptome assembly from RNA-Seq data without a reference  
480 genome. *Nat. Biotechnol.* **29**, 644–652 (2011).
- 481 2. Fu, L., Niu, B., Zhu, Z., Wu, S. & Li, W. CD-HIT: accelerated for clustering the next-generation  
482 sequencing data. *Bioinformatics* **28**, 3150–3152 (2012).
- 483 3. Gilbert, D. Gene-omes built from mRNA-seq not genome DNA. Poster presented at the 7<sup>th</sup> Annual  
484 Arthropod Genomics Symposium in Notre Dame, Indiana (2013).
- 485 4. Li, H. Aligning sequence reads, clone sequences and assembly contigs with BWA-MEM.  
486 *arXiv:1303.3997 [q-bio.GN]* (2013).
- 487 5. Waterhouse, R. M. *et al.* BUSCO applications from quality assessments to gene prediction and  
488 phylogenomics. *Mol. Biol. Evol.* **35**, 543–548 (2018).
- 489 6. Langmead, B. & Salzberg, S. L. Fast gapped-read alignment with Bowtie 2. *Nat. Methods* **9**, 357–359  
490 (2012).
- 491 7. Li, B. & Dewey, C. N. RSEM: accurate transcript quantification from RNA-Seq data with or without a  
492 reference genome. *BMC Bioinformatics* **12**, 323 (2011).
- 493 8. Tautenhahn, R., Patti, G. J., Rinehart, D. & Siuzdak, G. XCMS Online: a web-based platform to process  
494 untargeted metabolomic data. *Anal. Chem.* **84**, 5035–5039 (2012).
- 495 9. Saeed, A. I. *et al.* TM4: a free, open-source system for microarray data management and analysis.  
496 *Biotechniques* **34**, 374–378 (2003).
- 497 10. Li, J., Witten, D. M., Johnstone, I. M. & Tibshirani, R. Normalization, testing, and false discovery rate  
498 estimation for RNA-sequencing data. *Biostatistics* **13**, 523–538 (2012).
- 499 11. R Core Team. R Foundation for Statistical Computing, Vienna, Austria. R: A language and environment  
500 for statistical computing. Available online at <https://www.R-project.org/> (2018)
- 501 12. Khazaei, H. *et al.* Flanking SNP markers for vicine–convicine concentration in faba bean (*Vicia faba* L.).  
502 *Mol. Breed.* **35**, 38 (2015).
- 503 13. Webb, A. *et al.* A SNP-based consensus genetic map for synteny-based trait targeting in faba bean  
504 (*Vicia faba* L.). *Plant Biotechnol. J.* **14**, 177–185 (2016).
- 505 14. Broman, K. W., Wu, H., Sen, S. & Churchill, G. A. R/qtl: QTL mapping in experimental crosses.  
506 *Bioinformatics* **19**, 889–890 (2003).
- 507 15. Weber, E., Engler, C., Gruetzner, R., Werner, S. & Marillonnet, S. A modular cloning system for  
508 standardized assembly of multigene constructs. *PLoS One* **6**, e16765 (2011).
- 509 16. Nadzieja, M., Stougaard, J. & Reid, D. A Toolkit for high resolution imaging of cell division and  
510 phytohormone signaling in legume roots and root nodules. *Front. Plant Sci.* **10**, 1000 (2019).
- 511 17. Stougaard, J. *Agrobacterium rhizogenes* as a vector for transforming higher plants. Application in *Lotus*  
512 *corniculatus* transformation. *Methods Mol. Biol.* **49**, 49–61 (1995).

- 513 18. Kereszt, A. *et al.* *Agrobacterium rhizogenes*-mediated transformation of soybean to study root biology.  
514 *Nat. Protoc.* **2**, 948–952 (2007).
- 515 19. Armenteros, J. J. A. *et al.* Detecting sequence signals in targeting peptides using deep learning. *Life*  
516 *science alliance* **2**, (2019).
- 517 20. Hiltunen, H.-M., Illarionov, B., Hedtke, B., Fischer, M. & Grimm, B. *Arabidopsis* RIBA proteins: two out  
518 of three isoforms have lost their bifunctional activity in riboflavin biosynthesis. *Int. J. Mol. Sci.* **13**, 14086–  
519 14105 (2012).
- 520 21. Lehmann, M. *et al.* Biosynthesis of riboflavin. Screening for an improved GTP cyclohydrolase II mutant.  
521 *FEBS J.* **276**, 4119–4129 (2009).
- 522 22. Yadav, S. & Karthikeyan, S. Structural and biochemical characterization of GTP cyclohydrolase II from  
523 *Helicobacter pylori* reveals its redox dependent catalytic activity. *J. Struct. Biol.* **192**, 100–115 (2015).

524

525

526

527

528

529

530

531

532

533

534

535

536

537

538

539

540

541

542

543

544

## 545 **Acknowledgements**

546 This work was supported by Innovation Fund Denmark grant number 5158-00004B; Academy of Finland  
547 decisions 298314 and 314961; UK Biotechnology and Biological Science Research Council award  
548 BB/P023509/1; VILLUM Foundation Project 15476; and Danish National Research Foundation grant  
549 DNRF99. We acknowledge the technical assistance of Anne-Mari Narvanto and Laura Vottonen<sup>3,7</sup> as well as  
550 the bioinformatic support and analyses by Jaakko Tanskanen<sup>8</sup>.

551

## 552 **Author Contributions**

553 FGF, SUA, and AHS conceived research plan; EB, MN, WC, LEH, DM, and DA carried out experiments and  
554 data analysis; HK, CC, DOS, and FLS provided instrumentation and resources; JS, DOS, AHS, AV, SUA, FLS,  
555 and FGF developed project design and acquired funding; JS coordinated the project; MN and SUA prepared  
556 figures; SUA and FGF wrote the manuscript with input from all authors.

557

558

559 **Supplementary information** is available for this paper.

560

561 **Correspondence** and **requests for materials** should be addressed to FGF ([feg@plen.ku.dk](mailto:feg@plen.ku.dk)), SUA  
562 ([sua@mbg.au.dk](mailto:sua@mbg.au.dk)), or AHS ([alan.schulman@helsinki.fi](mailto:alan.schulman@helsinki.fi)).

563

564

565

566

567

568

569

570

571

572

573

574

575

576 **Figures and Figure legends**

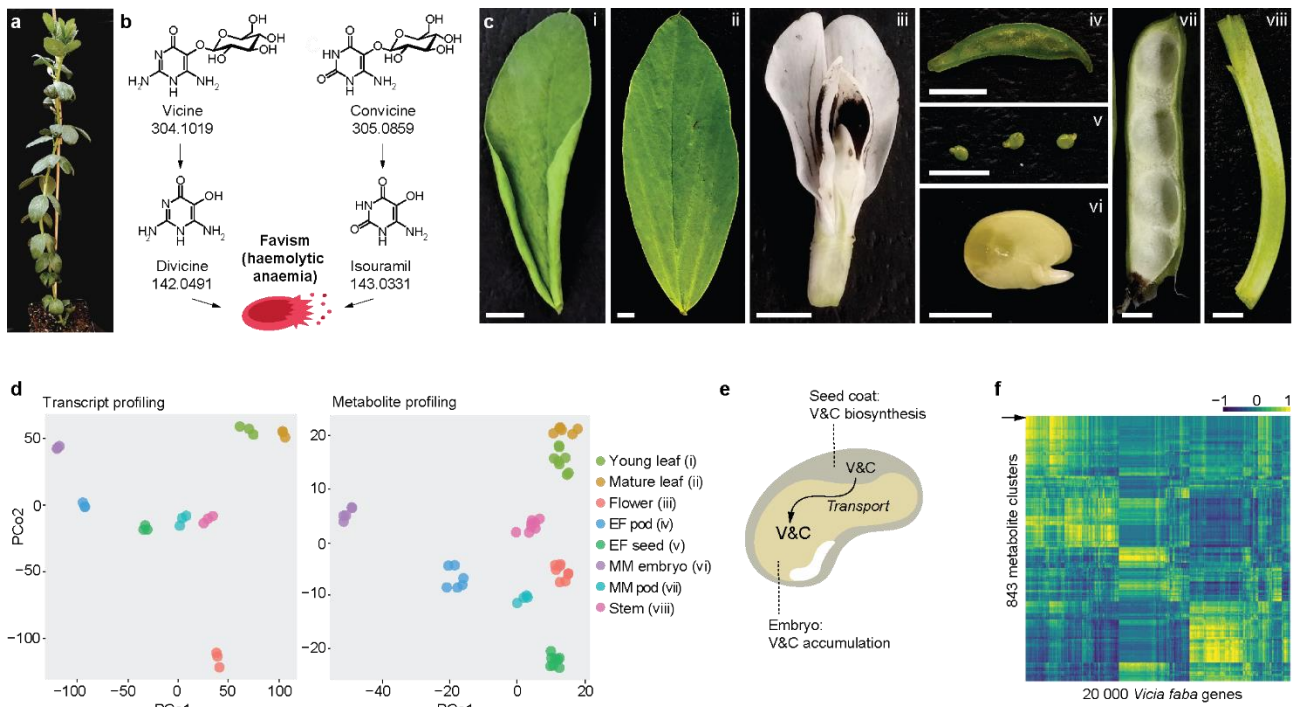

577

578 **Figure 1. Gene expression analysis and metabolite profiling of eight faba bean tissues. (a)** Faba bean plant  
 579 at the onset of flowering. **(b)** The effect of vicine and convicine in individuals affected by favism. Once  
 580 ingested, vicine and convicine are hydrolysed to divicine and isouramil, respectively. These metabolic  
 581 products cause irreversible oxidative stress in red blood cells, leading to favism - haemolytic anaemia. Exact  
 582 neutral masses are shown below compound names. **(c)** Faba bean tissues used for the gene expression and  
 583 metabolite profiling: i) young leaves, ii) mature leaves, iii) flowers, iv) whole seeds at an early seed-filling  
 584 stage (EF seeds), v) pods from an early seed-filling stage (EF pods), vi) embryos at mid maturation stage  
 585 (MM embryo), vii) pods at the mid maturation stage (MM pods), viii) stems. Scale bars correspond to 5 mm.  
 586 **(d)** Principal coordinate analysis of the gene expression and metabolite profiling datasets. Samples  
 587 corresponding to the same tissue cluster together. All tissues are represented by distinct clusters. See  
 588 tissue abbreviations above. **(e)** Current hypothesis on the translocation of vicine and convicine from  
 589 biosynthetic, maternal tissues (e.g. seed coat) to the embryo. V&C, vicine and convicine. **(f)** Heat map  
 590 representing the correlations of 843 metabolite clusters with 20 000 faba bean genes. MM embryos were  
 591 not included in this analysis. The arrowhead indicates the metabolite feature cluster representing vicine  
 592 (cluster 103).

593

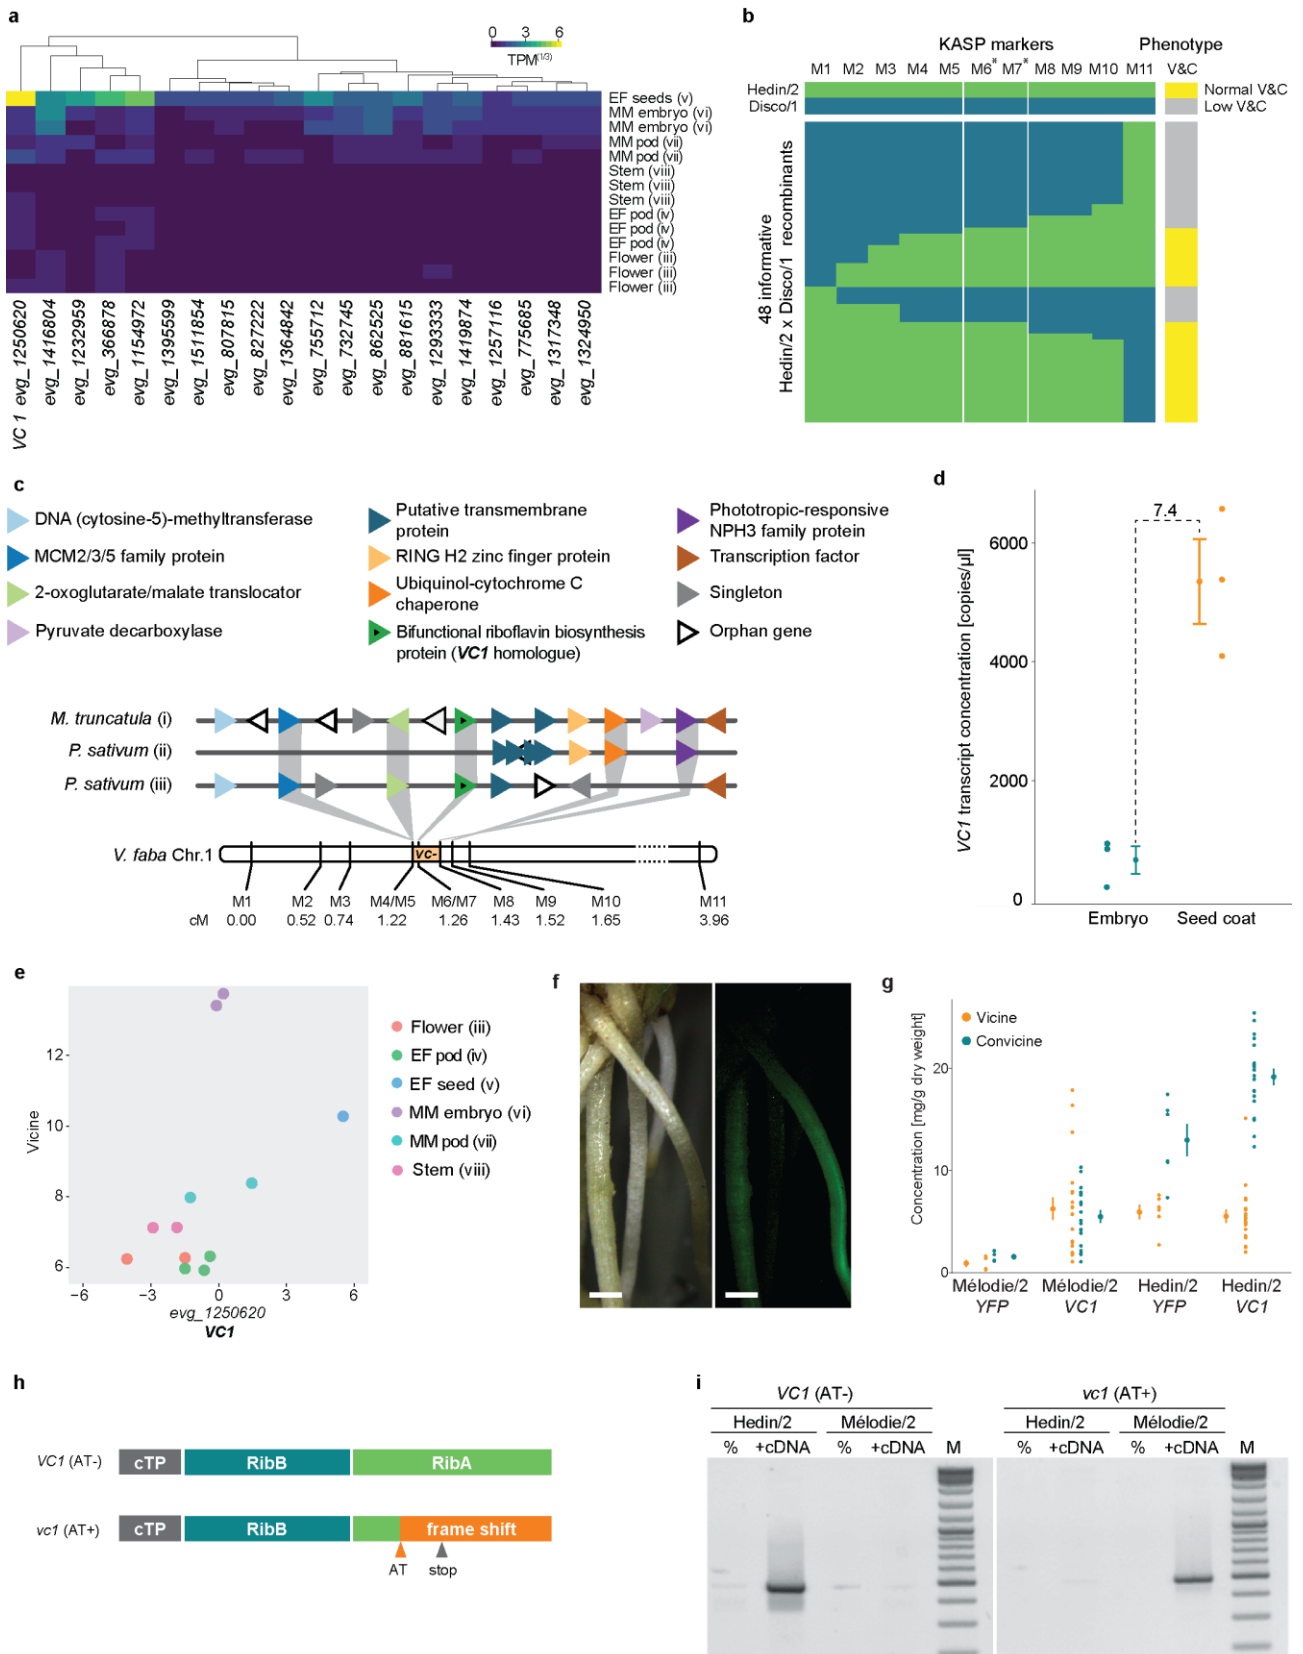

594

595 **Figure 2. Identification of *VC1* as the *vc-* gene.** **a)** Expression profile of the 20 genes most tightly correlated  
 596 with vicine accumulation. The gene with the highest expression in whole seeds at an early maturation stage  
 597 (EF seeds) is *evg\_1250620* (*VC1*). None of these genes had detectable expression levels in leaf samples. **(b)**  
 598 Narrowing of the genetic *vc-* interval using a Hedini/2 (normal-vicine and convicine) x Disco/1 (low-vicine



599 and convicine) fine mapping population. Genotypes were assessed using competitive allele-specific PCR  
600 (KASP) markers. The genotypes and phenotypes of the parent lines are colour-coded and shown at the top.  
601 Allele calls and phenotypes of 48 informative recombinants are shown below using the same colour coding.  
602 Markers with an asterisk are positioned within the *VC1* gene. Marker sequences are described in **Extended**  
603 **Data Table 2**, and vicine and convicine levels are shown in **Extended Data Fig. 2**. V&C, vicine and convicine.  
604 **(c)** Syntenic context view of the alignment between the *V. faba* *vc1* interval and collinear segments of *M.*  
605 *truncatula* (i - chr 2 from 1,801,324 to 1,875,086 bp) and *Pisum sativum* (ii - chr1 from 364,253,845 to  
606 364,332,337 bp, iii - chr1 from 364,630,606 to 364,960,000 bp). Protein-coding genes are shown as  
607 differently coloured triangles, where triangles of the same colour represent a group of orthologous genes.  
608 Gene annotations are taken from the *M. truncatula* assembly Mt4.0v2. The genetic distance between  
609 markers on chromosome 1 of *V. faba* (Chr1) is shown in centimorgans (cM). **(d)** *VC1* transcript abundance  
610 in embryo and seed coat of the normal-vicine line Hedin/2 as determined by ddPCR. For each tissue, the  
611 individual data points represent biological variation, where each data point is the average of three technical  
612 replicates. Error bars represent the overall standard deviation per tissue. **(e)** Correlation between the  
613 logarithms of vicine content (metabolic feature 89) and *VC1* transcript abundance across Hedin/2 tissues as  
614 shown by the initial gene expression analysis and metabolite profiling. **(f)** Hairy roots of faba bean  
615 transformed with *YFP* under the control of the *pLjUbi* promoter. Pictures taken under white light (left) and  
616 UV light (right) are shown. The scale bar corresponds to 1 mm. **(g)** Vicine and convicine content in hairy  
617 roots transformed with *YFP* (control) or *VC1* under the control of the *pLjUbi* promoter in the background of  
618 either Mélodie/2 (low-vicine and convicine) and Hedin/2 (normal-vicine and convicine) lines. Error bars  
619 represent standard deviation. **(h)** Predicted functional domains of *VC1* and the effect of the AT dinucleotide  
620 insertion (AT) in *vc1*. cTP, chloroplast transit peptide; RibB, 3,4-dihydroxy-2-butanone-4-phosphate  
621 synthase domain, RibA, GTP cyclohydrolase II domain. **(i)** Selective PCR amplification of *VC1* from Hedin/2  
622 seed coat cDNA and *vc1* from Mélodie/2 seed coat cDNA. No cDNA was added to the negative controls (%).  
623 M, size marker.

624

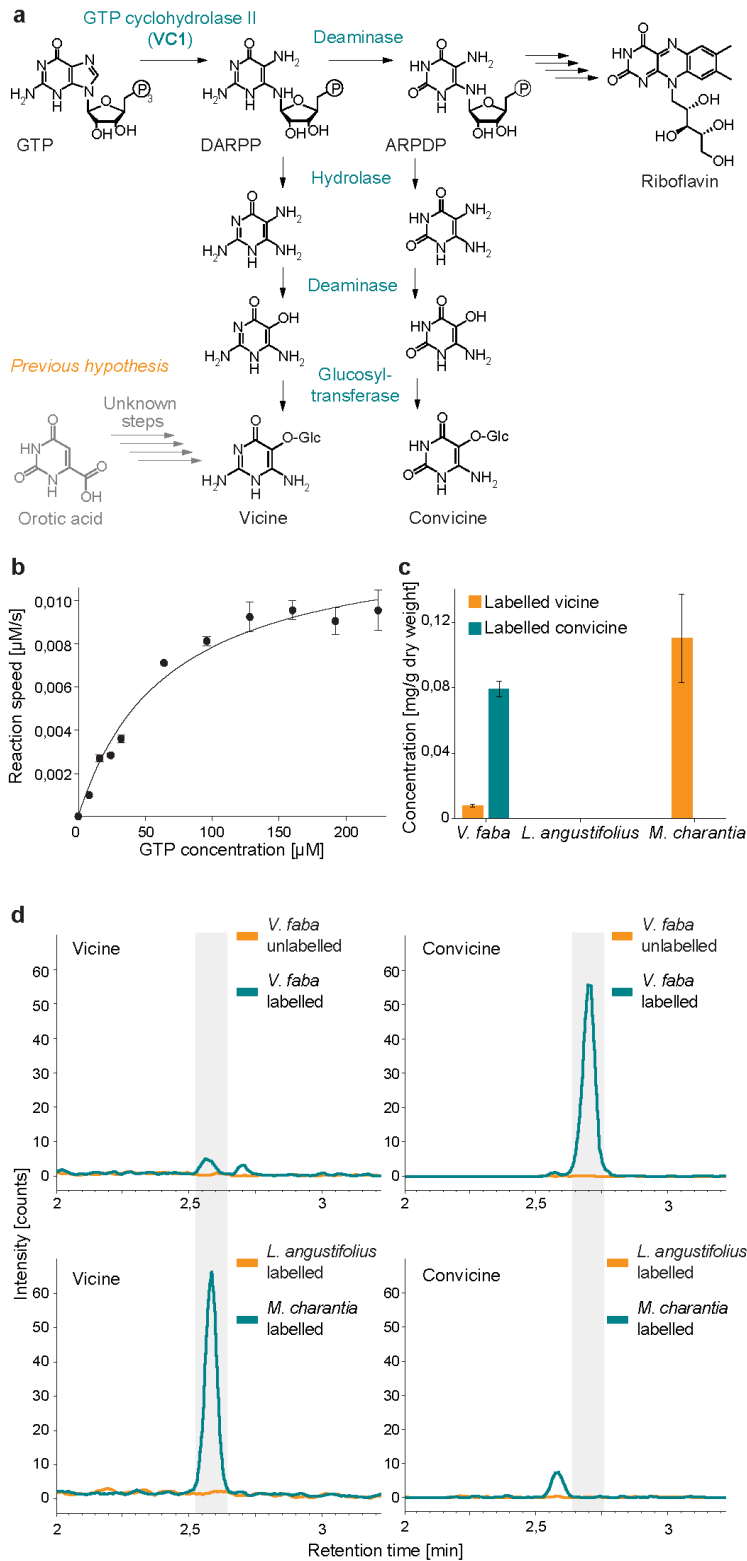

625

626

627

628

629

630

631

**Figure 3. Characterization of VC1 as a GTP cyclohydrolase II involved in vicine and convicine biosynthesis and establishment of GTP as a biosynthetic precursor. (a)** Proposed pathway for the biosynthesis of vicine and convicine. **(b)** Michaelis–Menten kinetics of the GTP to DARPP conversion catalyzed *in vitro* by purified VC1. **(c)** Feeding of *V. faba*, *L. angustifolius* and *M. charantia* roots with  $^{13}\text{C}_{10}$ ,  $^{15}\text{N}_5$ -GTP (labelled GTP) and its incorporation into vicine and convicine. Feeding with unlabelled GTP was performed as a control. **(d)** Elution profiles of labelled vicine (panels on the left) and labelled convicine (panels on the right) from the

632 feeding experiments. The top row includes faba bean fed with labelled and unlabelled GTP. The bottom  
633 row includes *Lupinus angustifolius* (Fabaceae, non-vicine and convicine producer) and *Momordica*  
634 *charantia* (non-Fabaceae, vicine producer) fed with labelled GTP.

635

636 **Extended data**

637

638 **Extended Data Table 1.** Parameters of the *Vicia faba* Hedin/2 transcript assembly. Open reading frames  
639 (ORFs) were predicted using Transdecoder.

| Feature               | Stat     |
|-----------------------|----------|
| Transcripts           | 49277    |
| ORFs                  | 35663    |
| Total bases           | 41144820 |
| GC content            | 42.54%   |
| N50                   | 1314     |
| Median contig length  | 501      |
| Average contig length | 835      |
| Complete BUSCO        | 94.60%   |
| Single BUSCO          | 89.90%   |
| Duplicated BUSCO      | 4.70%    |
| Missing BUSCO         | 3.90%    |
| Fragmented BUSCO      | 1.50%    |

640

641

642

643

644

645

646

647

648

649

650

651

652

653

654

655

656

657

658

659 **Extended Data Table 2.** SNP KASP markers developed to saturate the *vc* interval. *V. faba* Hedin/2 and *M. truncatula* transcript IDs are listed. Full polymorphism  
660 sequences distinguishing between Hedin/2 and Disco/1 inbred lines are specified.

| Marker name                   | Hedin/2 Gene Atlas homologue | Mt4.0v2 homologue      | Reference     | Hedin/2 allele | Disco/1 allele | Polymorphism Sequence                                                                                                  |
|-------------------------------|------------------------------|------------------------|---------------|----------------|----------------|------------------------------------------------------------------------------------------------------------------------|
| M1: Vf_Mt2g008150_001         |                              | <i>Medtr2g008150.1</i> | Webb, 2016    | C              | T              | GACTCACGTGATCGCAATCGTGGCCGAGATTATGGAGGTGGTCGAGGGTC( <b>C/T</b> )AATGGTGGTGAATGCTT<br>CAAGTGTGGTAAACCTGGTCATTTTGAAGAGA  |
| M2: Vf_Mt2g008610_001         | <i>evg_1322566</i>           | <i>Medtr2g008610.1</i> | Webb, 2016    | T              | C              | GCCATTGGAAGCAAAGTTGGTGTGCAGCTGCTAGTCCTAAAAGACTTAT( <b>T/C</b> )GTTGCTGCTGCTGCTTCT<br>GCACCAAAGAAATCATGGATCCCTGGTGTAG   |
| M3: AX-181190143              | <i>evg_95772</i>             | <i>Medtr2g008880.1</i> | This study    | T              | C              | CTAGTATTTTGTGCCTCAAACCTCCTGATAAGCTTAGGGAATTGATGAGG( <b>T/C</b> )TGTCTTTTGTAAACCTGC<br>TAGGGTTGTGCCTTCTTATTTCTTGAAGAT   |
| M4: AX-181184219              | <i>evg_996816</i>            | <i>Medtr2g009190.1</i> | This study    | G              | A              | GCTCCAACACCYAGCACTTGAGTACTTTCTTGTACTTTTATCTCCTGATA( <b>A/G</b> )TCATGGCACACAATAGTATT<br>CTCTACATACTGGAATTTGGAACCAACACA |
| M5: AX-181160542              | <i>evg_952151</i>            | <i>Medtr2g009220.1</i> | This study    | T              | C              | TTGAGTTGGCCAGCRTATTGGCTGCTCCTCAGTCTGCTTATTTCTTCAT( <b>C/T</b> )CACTACCTTTTGAAGCCA<br>GACTGGGCACGTAGGGGCTTATTCTCTGC     |
| M6: vcp2                      | <i>evg_12500620</i>          | <i>Medtr2g009270.1</i> | Khazaei, 2017 | T              | A              | TTGATAAGATATAGAAGAAAGAGAGACATATTAATAGAACGCTCTTCTGC( <b>T/A</b> )GCAAGATTACCTACTCAG<br>TGGGGGAAATTCACATCATATTGTTATAAGTC |
| M7: <i>evg_12500620vc_580</i> | <i>evg_12500620</i>          | <i>Medtr2g009270.1</i> | This study    | C              | A              | TCACTGTGTCAGTGGATGCTAAACATGGTACCACCACAGGGGTGTCAGCT( <b>A/C</b> )ATGACAGGGCAGCTACT<br>GTCTTGGCACTTGATCTAGAGGTTCAACTCCG  |
| M8: AX-181438475              | <i>evg_49825</i>             | <i>Medtr2g009340.1</i> | This study    | A              | T              | CATATTCAATCAGAAAAAAGAGAGACTCGTGTATCAGAATATTTATAGA( <b>A/T</b> )GATAGTGTATATTATGA<br>GGATGAAATTAAGTAGCAAAAACAAAGTTCATA  |
| M9: Vf_Mt2g009320_001         | <i>evg_7985</i>              | <i>Medtr2g009320.1</i> | Webb, 2016    | T              | A              | TCTAAACCTGTTCTCTGGCCCTKCCTCGTGACTCGCCGCTAAGAGTTGA( <b>T/A</b> )GAACCTGATTATCAGGGG<br>GTTAAGCGATTATGCTCAAACCTCATGCTGTT  |
| M10: AX-181470232             | <i>evg_1510517</i>           | <i>Medtr2g009600.1</i> | This study    | C              | T              | TCGCAATATCTGCGGTTGGCGATCGAGAAGCGACGGCAATGTCGATTCC( <b>C/T</b> )TTGTGTTTGAAGCTAACCA<br>AGATTCCCATGGCGTGGGGATAGAGAGAAGG  |
| M11: Vf_Mt2g011080_001        | <i>evg_204562</i>            | <i>Medtr2g011080.1</i> | Webb, 2016    | G              | C              | AGGTACCTGAAATATTGTCTGAAGAGATACTTAGGAAGATGAAAGACCA( <b>G/C</b> )CRAGGAGTGAAGTTCCA<br>GACATTTCAACAAAAGAACTTACAGAAGCAGATG |

661  
662

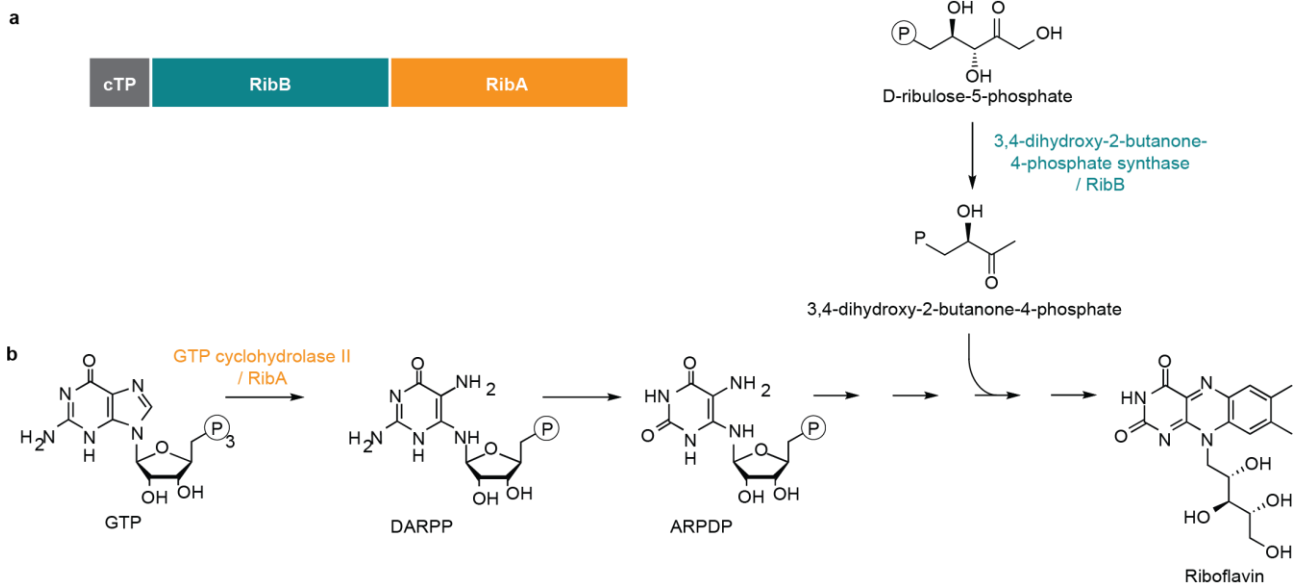

663

664 **Extended Data Figure 1.** Canonical function of the bifunctional enzyme 3,4-dihydroxy-2-butanone 4-  
665 phosphate synthase/GTP cyclohydrolase II in plants. **(a)** Domain structure. The protein is composed of a  
666 chloroplast targeting peptide (cTP) fused to two catalytic domains: the 3,4-dihydroxy-2-butanone-4-  
667 phosphate synthase domain, also called RibB, and the GTP cyclohydrolase II domain, also called RibA. **(b)**  
668 Biochemical function of each catalytic domain in the context of the riboflavin biosynthesis pathway.

669

670

671

672

673

674

675

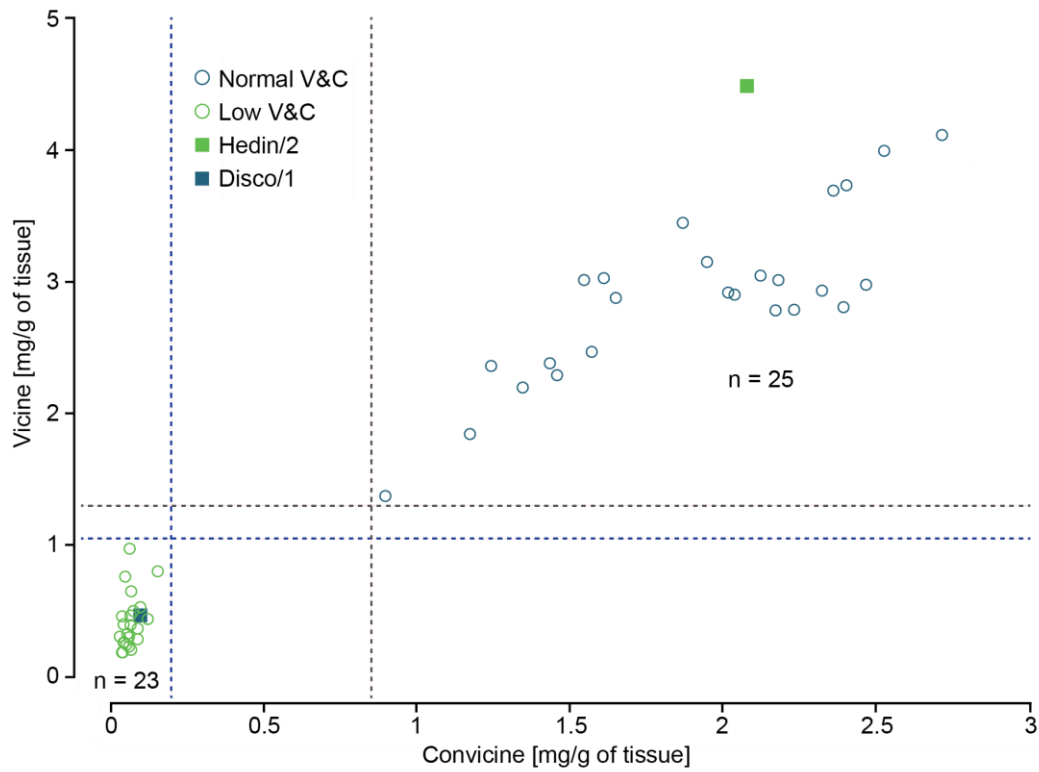

676

677

678

679

680

681

**Extended Data Figure 2.** Seed vicine and convicine phenotypes of Hedin/2 x Disco/1 pseudo-F2 recombinants within the  $vc^-$  interval. Recombinants are classified as Normal (blue open circles) where vicine levels are >1.3 mg/g and convicine levels are >0.85 mg/g or as Low (green open circles) where vicine levels are <1.05 mg/g and convicine levels are <0.2 mg/g. Parental means are shown as squares for Hedin/2 (green) and Disco/1 (blue).

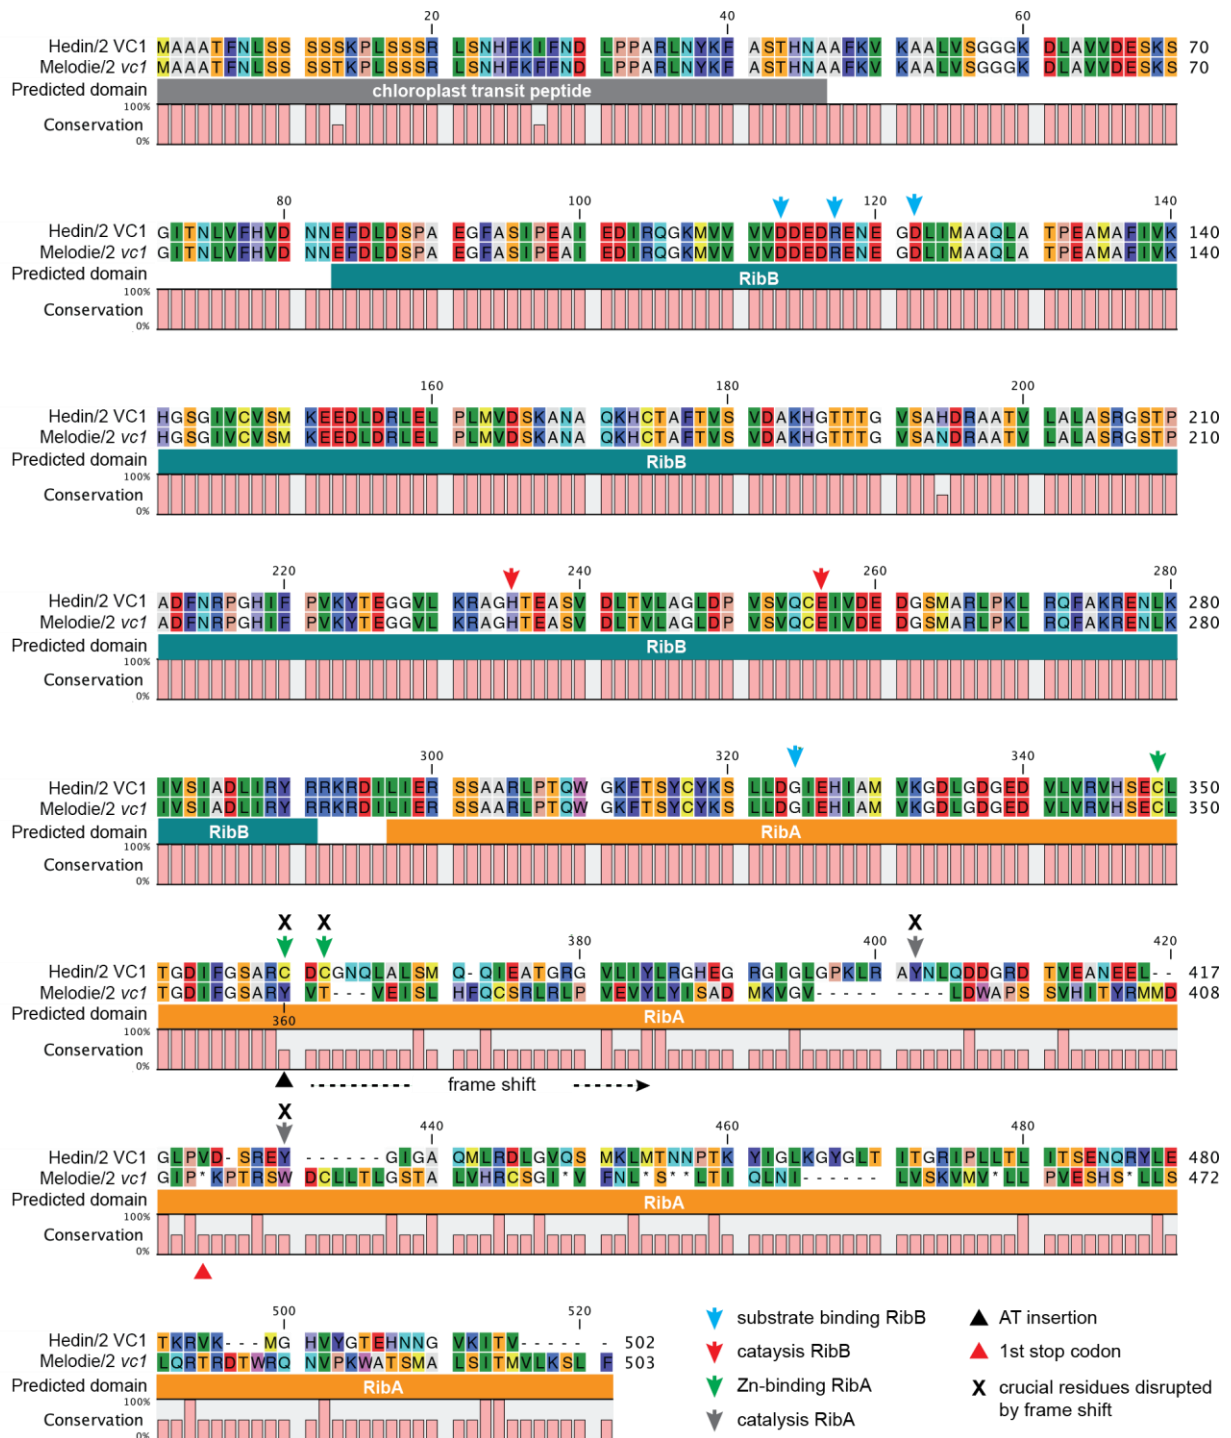

682

683

684 **Extended Data Figure 3. Consequence of the additional AT dinucleotide on the predicted VC1 protein.** An  
 685 alignment of Hedin/2 VC1 and M elodie/2 vc1 amino acid sequences is shown. Predicted domains are  
 686 shown underneath the alignment (RibB, 3,4-dihydroxy-2-butanone-4-phosphate synthase domain; RibA,  
 687 GTP cyclohydrolase II domain). A measurement of residue conservation is shown underneath the predicted  
 688 domains, distinguishing between identical residues and other scenarios (non-identical ones as well as  
 689 gaps/insertions). The position of the AT insertion resulting in frame shift marked with a black triangle  
 690 underneath the conservation score (position 360). The following key residues in VC1 enzymatic domains are  
 691 marked: blue arrows, substrate binding in RibB; red arrows, catalysis in RibB; green arrows, Zn-binding  
 692 cytosines in RibA; grey arrows, catalytic tyrosines in RibA. The residue prediction is based on Hiltunen et al.  
 693 (2012).



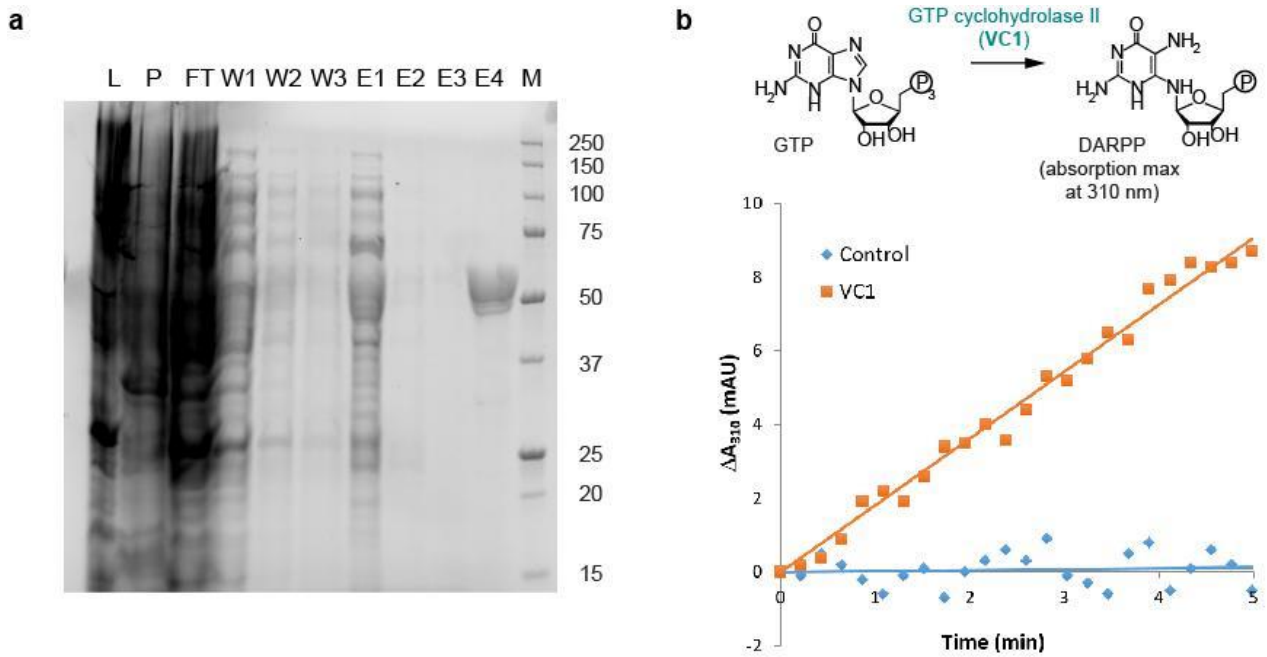

694

695 **Extended Data Figure 4.** VC1 expression, purification, and assays. **(a)** SDS-PAGE gel showing the affinity-  
696 purification of His-tagged VC1 on a Ni-NTA matrix. L, lysate; P, pellet; FT, flow-through; W1-3, three  
697 consecutive wash fractions; E1-4, elutions with increasing concentration of imidazole (20, 50, 100, and 250  
698 mM, respectively); M, molecular weight marker (given in kDa). The expected molecular weight of His-  
699 tagged VC1 was 51.3 kDa. After buffer exchange to remove the imidazole, fraction E4 was used for the  
700 subsequent assays. **(b)** Representative result of the GTP cyclohydrolase II assays measuring the appearance  
701 of DARPP, which presents an absorption maximum at 310 nm. The graph shows the increase in absorbance  
702 at 310 nm ( $\Delta A_{310}$ ) against time for a control (no enzyme) and for an assay with purified VC1.

703

704

705

706

707

708

709

710

711

712

713

714

715

716

717

718

719 **SI Guide**

720 **Supplementary File 1.** Transcriptome coding sequences in fasta format.

721 **Supplementary File 2.** Gene expression counts in transcripts per million (TPM).

722 **Supplementary File 3.** List of metabolic features, their grouping into clusters, and their abundances across  
723 tissue samples.

724 **Supplementary File 4.** List of top-20 genes correlated with vicine accumulation levels in all tissues except  
725 mid-maturation embryos.

726 **Supplementary File 5.** R scripts used to analyse gene-to-metabolite correlations.

727 **Supplementary File 6.** *VC1* and *vc1* cDNA sequences and predicted amino acid sequences.

728 **Supplementary File 7.** Design of the expression constructs used in the study.
